# Supplementary material for: Machine learning assisted dynamic phenotypes and genomic variants help understand the ecotype divergence in rapeseed
Source: Front Plant Sci. 2022 Nov 15;13:1028779. doi: 10.3389/fpls.2022.1028779 (PMC9705987; doi:10.3389/fpls.2022.1028779)
Supplement: Supplementary file 4 [file Table_3.xlsx]

## Sheet: sheet1
Supplementary Table S3. Trait explanations of 41 dynamic i-traits and 30 growth-related traits across 11 time points
Side-view traits	Histogram texture traits	Mean value of whole plant in side view	M_TEX_SV
		Standard error of whole plant in side view	SE_TEX_SV
		Smoothness of whole plant in side view	S_TEX_SV
		Third moment of whole plant in side view	MU3_TEX_SV
		Uniformity of whole plant in side view	U_TEX_SV
		Entropy of whole plant in side view	E_TEX_SV
	Plant morphological traits	Total projected area in side view	TPA_SV
		Plant vertical height in side view	H_SV
		Plant width in side view	W_SV
		The ratio of height and width of whole plant in side view	HWR_SV
		Fractal dimension without image cropping of whole plant in side view	FDNIC_SV
		Fractal dimension with image cropping of whole plant in side view	FDIC_SV
		Total projected area / bounding rectangle area ratio in side view	R_SV
		Perimeter / projected area ratio of whole plant in side view	PAR_SV
		Convex hull area of whole plant in side view	HA_SV
		Total projected area / convex hull area of whole plant in side view	AC_SV
		Green projecte area in side view	GPA_SV
		Plant compactness of whole plant traits in side view	PC1_SV
		Plant compactness of whole plant traits in side view	PC2_SV
		Plant compactness of whole plant traits in side view	PC3_SV
		Plant compactness of whole plant traits in side view	PC4_SV
		Plant compactness of whole plant traits in side view	PC5_SV
		Plant compactness of whole plant traits in side view	PC6_SV
	Growth-related traits		a_linear_SV
			b_linear_SV
			a_power_SV
			b_power_SV
			a_Exp_SV
			b_Exp_SV
			a_log_SV
			b_log_SV
			a_quadratic_SV
			b_quadratic_SV
			c_quadratic_SV
			a_sin_SV
			b_sin_SV
			c_sin_SV
			d_sin_SV
Top-view traits	Color traits	Green color value in top view	GCV_TV
	Histogram texture traits	Mean value of whole plant in top view	M_TEX_TV
		Standard error of whole plant in top view	SE_TEX_TV
		Smoothness of whole plant in top view	S_TEX_TV
		Third moment of whole plant in top view	MU3_TEX_TV
		Uniformity of whole plant in top view	U_TEX_TV
		Entropy of whole plant in top view	E_TEX_TV
	Plant morphological traits	Total projected area in top view	TPA_TV
		Plant vertical height in top view	H_TV
		Plant width in top view	W_TV
		The ratio of height and width of whole plant in top view	HWR_TV
		Fractal dimension without image cropping of whole plant in top view	FDNIC_TV
		Fractal dimension with image cropping of whole plant in top view	FDIC_TV
		Total projected area / bounding rectangle area ratio in top view	R_TV
		Perimeter / projected area ratio of whole plant in top view	PAR_TV
		Convex hull area of whole plant in top view	HA_TV
		Total projected area / convex hull area of whole plant in top view	AC_TV
		Green projecte area in top view	GPA_TV
	Growth-related traits		a_linear_TV
			b_linear_TV
			a_power_TV
			b_power_TV
			a_Exp_TV
			b_Exp_TV
			a_log_TV
			b_log_TV
			a_quadratic_TV
			b_quadratic_TV
			c_quadratic_TV
			a_sin_TV
			b_sin_TV
			c_sin_TV
			d_sin_TV
